# Supplementary material for: Efficient epoxidation of olefins by H2O2 catalyzed by iron “helmet” phthalocyanines
Source: Royal Society of Chemistry journal article supplement (doi:10.1039/c3cc42301h), 2013-01-01
Supplement: c3cc42301h.pdf [file c3cc42301h.pdf]

## Supplementary Information for

### **Efficient epoxidation of olefins by H<sub>2</sub>O<sub>2</sub> catalyzed by iron “helmet” phthalocyanine**

Igor Y. Skobelev,<sup>a,b</sup> Evgeny V. Kudrik,<sup>a,c</sup> Olga V. Zalomaeva,<sup>b</sup> Florian Albrieux,<sup>d</sup> Pavel Afanasiev,<sup>a</sup> Oxana A. Kholdeeva<sup>b</sup> and Alexander B. Sorokin\*<sup>a</sup>

<sup>a</sup> *Institut de Recherches sur la Catalyse et l'Environnement de Lyon (IRCELYON), CNRS, UMR 5256, Université Lyon 1, 2, av. A. Einstein, 69626 Villeurbanne, France.*

[alexander.sorokin@ircelyon.univ-lyon1.fr](mailto:alexander.sorokin@ircelyon.univ-lyon1.fr), [pavel.afanasiev@ircelyon.univ-lyon1.fr](mailto:pavel.afanasiev@ircelyon.univ-lyon1.fr)

<sup>b</sup> *Boreskov Institute of Catalysis, pr. Lavrentieva 5, Novosibirsk, 630090, Russia.*

<sup>c</sup> *Institute of Macroheterocyclic Compounds, Ivanovo State University of Chemistry and Technology, 7, av. F. Engels, 153000, Ivanovo, Russia.*

<sup>d</sup> *Université Lyon 1, UMR 5246, Centre Commun de Spectrométrie de Masse, 43 bd du 11 Novembre 1918, 69622 Villeurbanne cedex, France.*

#### **This PDF file includes**

Materials and Methods

Supplementary References

Supplementary Table S1

## Materials

Solvents and chemicals were obtained from Alfa Aesar and Sigma-Aldrich and used without purification. Aqueous 35 % hydrogen peroxide solution was purchased from Sigma-Aldrich.

*Preparation of 14,28-[1,3-diiminoisoindolato]phthalocyaninatoiron(III) complex (hPcFe) and 14,28-[1,3-diimino-6-tert-butylisoindolato]tetra-tert-butylphthalocyaninatoiron(III) complex (hPc<sup>t</sup>Bu<sub>4</sub>Fe).* The complexes were synthesized and purified according to the protocol adapted from ref. S1. Metal iron (300 mg) was dissolved in deoxygenated mixture of 1 mL AcOH and 9 mL H<sub>2</sub>O under argon atmosphere. After dissolving of iron, 1 mL of the resulting solution was placed into Schlenk tube and was dried in vacuum at room temperature to obtain 100 mg of white solid Fe(OAc)<sub>2</sub> x 4H<sub>2</sub>O. Iron(II) acetate tetrahydrate was dissolved in 2 mL of deoxygenated MeOH and placed into the glass autoclave filled up with Ar. The solution of 1,2-dicyanobenzene (500 mg in 6 mL MeOH) or the solution of 4-*tert*-butyl-1,2-dicyanobenzene (620 mg in 6 mL MeOH) was added to autoclave to obtain hPcFe or hPc<sup>t</sup>Bu<sub>4</sub>Fe, respectively. The autoclave was heated at 130° C during 1 week. The target products were purified by flash column chromatography as described [S1]. The product yields were 19-22%. EPR technique showed the presence of low spin Fe(III) with g factors of 2.192, 2.091, 1.948 for hPcFe and 2.193, 2.148, 1.927 for hPc<sup>t</sup>Bu<sub>4</sub>Fe, respectively.

*Preparation of oxo species* The high-valent oxo complexes hPc<sup>t</sup>Bu<sub>4</sub>Fe=O and hPcFe=O were prepared from 10<sup>-6</sup> M hPc<sup>t</sup>Bu<sub>4</sub>Fe and hPcFe solutions by addition of 1000 equiv H<sub>2</sub>O<sub>2</sub> at -60°C. The resulting mixtures were incubated at low temperature for 2-3 min and MS analysis was rapidly performed. Among several solvents tested for this preparation

(CH<sub>2</sub>Cl<sub>2</sub>, CH<sub>3</sub>CN, CH<sub>3</sub>OH, DMF, acetone and their mixtures) the mixture of MeOH/acetone (8:2, v/v) was found to be the optimal for the formation of hydroperoxo and oxo species accompanied by the lesser protonation.

### **Equipment and Methods**

The mass spectra were recorded in a positive ion mode on a hybrid quadrupole time-of-flight mass spectrometer (MicroTOFQ-II Bruker Daltonics, Bremen) with a Cold Spray Ionization (CSI) ion source. The spray gas pressure was 0,6 bar and dry gas flow was 5 L/min. The CSI temperatures conditions for the analyses were -40°C for the spray gas and 2°C for the dry gas. These conditions permit to keep intact labile complex in the gas phase. The capillary voltage was +4,5 kV. The solutions were infused at 180 µL/h. The mass range of the analysis was 50-1500 m/z and the calibration was done with sodium formate. The UV-vis spectra of solutions were obtained with Agilent 8453 diode-array spectrophotometer. Low temperature UV-vis studies were carried out using liquid nitrogen cooled cryostat and a C Technologies immersion probe (5 mm path length) and fiber-optic cable. EPR spectra were recorded on a Bruker ER-200D in 3 mm quartz tube; conditions : -196°C, microwave frequency 9.3-9.4 GHz, modulation frequency 100 kHz, modulation amplitude 5 G.

The reaction products were identified by GC-MS method (Hewlett Packard 5973/6890 system ; electron impact ionization at 70 eV, He carrier gas, 30m x 0.25 mm HP-INNOWax capillary column, polyethylene glycol (0.25 µm coating) or DB-5MS 50 m capillary column (0.250 mm x 0.25 µm).

**Computational details.** Geometry optimization of hFePc-tBu structure with  $S=1/2$  followed by numerical frequencies calculation was performed with ORCA 2.9.0 program [S2]. Central differences were used in numerical frequencies calculation. All computation were done using BP density functional, TZVP [S3] basis set on iron and VDZP [S2] basis set on other atoms. Relativistic corrections were treated by using the ZORA [S4] approximation. The convergence criteria for the SCF part are chosen to be  $10^{-8}$  Hartree (Eh) in energy,  $10^{-7}$  Eh for the change of elements of the density matrix and  $5 \cdot 10^{-7}$  Eh for the maximum element of the direct inversion of iterative subspace (DIIS) error. Geometry is considered to be converged when the change in energy is less than  $10^{-6}$  Eh, the average force is smaller than  $3 \cdot 10^{-5}$  Eh·bohr<sup>-1</sup>, and the maximum force is smaller than  $10^{-4}$  Eh·bohr<sup>-1</sup>. The optimized Cartesian coordinates in angstroms and vibrational frequencies are presented in Table S1.

Table S1. Optimized Cartesian coordinates and vibrational frequencies calculated for hPc<sup>t</sup>Bu<sub>4</sub>Fe.

| Atom | X        | Y        | Z         |
|------|----------|----------|-----------|
| Fe   | 3.891564 | 7.167124 | 12.672542 |
| N    | 4.840120 | 6.021081 | 11.525362 |
| N    | 3.022996 | 5.098965 | 10.202566 |
| N    | 2.343572 | 6.866674 | 11.683061 |
| N    | 0.700070 | 8.073357 | 13.068998 |
| N    | 2.859807 | 7.711016 | 14.145925 |

---

|   |           |          |           |
|---|-----------|----------|-----------|
| N | 4.582823  | 7.941738 | 15.843417 |
| N | 5.444354  | 7.501293 | 13.642773 |
| N | 7.136118  | 6.641801 | 12.068719 |
| N | 1.783454  | 9.197899 | 11.237720 |
| N | 4.108597  | 8.742171 | 11.822461 |
| N | 6.529149  | 8.971977 | 12.029525 |
| C | 6.257981  | 5.886180 | 11.501857 |
| C | 6.575298  | 4.747607 | 10.605380 |
| C | 7.797570  | 4.162709 | 10.259058 |
| H | 8.719280  | 4.559413 | 10.704608 |
| C | 7.808730  | 3.082008 | 9.346895  |
| C | 6.567439  | 2.641243 | 8.811011  |
| H | 6.560768  | 1.802712 | 8.097697  |
| C | 5.340379  | 3.235666 | 9.147606  |
| H | 4.393406  | 2.884999 | 8.711767  |
| C | 5.357246  | 4.297282 | 10.060263 |
| C | 4.284856  | 5.153777 | 10.606425 |
| C | 2.139723  | 6.011174 | 10.673541 |
| C | 0.803805  | 6.241381 | 10.089756 |
| C | 0.118247  | 5.564107 | 9.071256  |
| H | 0.599495  | 4.700488 | 8.593715  |
| C | -1.166617 | 6.012267 | 8.693005  |

---

|   |           |          |           |
|---|-----------|----------|-----------|
| C | -1.704343 | 7.140970 | 9.366437  |
| H | -2.705837 | 7.503940 | 9.087282  |
| C | -1.008187 | 7.827008 | 10.379501 |
| H | -1.447863 | 8.704285 | 10.876280 |
| C | 0.257156  | 7.362682 | 10.734494 |
| C | 1.280074  | 7.901469 | 11.738416 |
| C | 1.458014  | 7.962675 | 14.106537 |
| C | 1.013250  | 8.184890 | 15.504769 |
| C | -0.249746 | 8.434583 | 16.040941 |
| H | -1.118024 | 8.467961 | 15.366027 |
| C | -0.382902 | 8.641839 | 17.438025 |
| C | 0.787372  | 8.595572 | 18.237142 |
| H | 0.707655  | 8.756670 | 19.320809 |
| C | 2.065292  | 8.355622 | 17.695594 |
| H | 2.961515  | 8.335608 | 18.332931 |
| C | 2.165837  | 8.145318 | 16.317973 |
| C | 3.322643  | 7.905049 | 15.431857 |
| C | 5.578172  | 7.841130 | 14.930996 |
| C | 6.991411  | 8.157465 | 15.216452 |
| C | 7.632941  | 8.490605 | 16.417907 |
| H | 7.039431  | 8.530835 | 17.340727 |
| C | 9.018973  | 8.761789 | 16.403778 |

---

|   |           |           |           |
|---|-----------|-----------|-----------|
| C | 9.700512  | 8.687918  | 15.160164 |
| H | 10.781928 | 8.893550  | 15.129463 |
| C | 9.051274  | 8.365635  | 13.953393 |
| H | 9.605379  | 8.323806  | 13.004221 |
| C | 7.683608  | 8.100481  | 13.996055 |
| C | 6.688494  | 7.773041  | 12.879305 |
| C | 3.048327  | 9.484249  | 11.279690 |
| C | 3.673889  | 10.699787 | 10.697976 |
| C | 3.121841  | 11.801612 | 10.035076 |
| H | 2.034191  | 11.877996 | 9.890321  |
| C | 3.996120  | 12.795672 | 9.567135  |
| H | 3.564532  | 13.664846 | 9.047148  |
| C | 5.405784  | 12.721870 | 9.737570  |
| C | 5.939599  | 11.599228 | 10.409838 |
| H | 7.017493  | 11.477928 | 10.579528 |
| C | 5.071585  | 10.605873 | 10.877011 |
| C | 5.355453  | 9.354237  | 11.629147 |
| C | 6.298683  | 13.856586 | 9.189607  |
| C | -1.990266 | 5.322479  | 7.582728  |
| C | 9.114608  | 2.377607  | 8.919370  |
| C | 9.802799  | 9.134089  | 17.681904 |
| C | -1.781978 | 8.912728  | 18.032819 |

---

|   |           |           |           |
|---|-----------|-----------|-----------|
| C | -1.742251 | 9.115319  | 19.561494 |
| C | -2.707437 | 7.707550  | 17.724243 |
| C | -2.369925 | 10.193865 | 17.386599 |
| C | -2.286501 | 6.343799  | 6.454636  |
| C | -1.240305 | 4.123880  | 6.965992  |
| C | -3.325589 | 4.807672  | 8.178144  |
| C | 9.041523  | 0.880590  | 9.316312  |
| C | 9.282184  | 2.498026  | 7.382759  |
| C | 10.355490 | 2.998807  | 9.593066  |
| C | 8.895968  | 9.162688  | 18.929288 |
| C | 10.924963 | 8.091638  | 17.919772 |
| C | 10.432067 | 10.539666 | 17.504869 |
| H | 9.494427  | 9.433499  | 19.822970 |
| H | 8.431901  | 8.175045  | 19.126673 |
| H | 8.083656  | 9.911481  | 18.833760 |
| H | 11.640184 | 8.051684  | 17.073782 |
| H | 10.502452 | 7.074608  | 18.051778 |
| H | 11.501483 | 8.345350  | 18.834073 |
| H | 11.005747 | 10.824801 | 18.411661 |
| H | 11.128277 | 10.576058 | 16.643017 |
| H | 9.649546  | 11.307835 | 17.338045 |
| H | -3.935709 | 4.314328  | 7.392634  |



---

|   |           |           |           |
|---|-----------|-----------|-----------|
| H | -3.932923 | 5.630333  | 8.606193  |
| H | -3.142966 | 4.069029  | 8.985223  |
| H | -2.881507 | 5.867699  | 5.647229  |
| H | -1.346513 | 6.727229  | 6.007898  |
| H | -2.862496 | 7.215421  | 6.825175  |
| H | -1.862849 | 3.656953  | 6.175702  |
| H | -0.283362 | 4.431019  | 6.497297  |
| H | -1.018473 | 3.341588  | 7.720000  |
| H | -2.464837 | 10.097380 | 16.286630 |
| H | -1.729107 | 11.075169 | 17.593592 |
| H | -3.381500 | 10.401530 | 17.793861 |
| H | -1.117114 | 9.985107  | 19.849474 |
| H | -2.767075 | 9.305019  | 19.940350 |
| H | -1.354672 | 8.220295  | 20.089656 |
| H | -3.723643 | 7.886996  | 18.133362 |
| H | -2.314047 | 6.775683  | 18.179320 |
| H | -2.810720 | 7.533010  | 16.634675 |
| H | 9.971031  | 0.355239  | 9.012471  |
| H | 8.190423  | 0.363130  | 8.829821  |
| H | 8.924791  | 0.764210  | 10.413092 |
| H | 11.269439 | 2.467155  | 9.258639  |
| H | 10.478439 | 4.068840  | 9.329530  |

---

|   |           |           |           |
|---|-----------|-----------|-----------|
| H | 10.310905 | 2.919558  | 10.698173 |
| H | 8.439543  | 2.030555  | 6.834888  |
| H | 9.339767  | 3.560582  | 7.070077  |
| H | 10.215118 | 1.993030  | 7.055862  |
| C | 7.794527  | 13.602939 | 9.467898  |
| C | 5.897512  | 15.194500 | 9.862564  |
| C | 6.100127  | 13.969045 | 7.656098  |
| H | 6.383134  | 13.024975 | 7.147411  |
| H | 5.047991  | 14.193456 | 7.388889  |
| H | 6.731569  | 14.783770 | 7.243860  |
| H | 6.526538  | 16.024094 | 9.477132  |
| H | 4.839000  | 15.457744 | 9.664935  |
| H | 6.032854  | 15.143798 | 10.962214 |
| H | 8.008933  | 13.536549 | 10.553767 |
| H | 8.152746  | 12.669188 | 8.989020  |
| H | 8.398891  | 14.438671 | 9.060138  |

Vibrational frequencies,  $\text{cm}^{-1}$

---

|       |        |        |         |         |
|-------|--------|--------|---------|---------|
| 12.42 | 380.73 | 857.00 | 1188.70 | 1482.65 |
| 16.26 | 385.49 | 873.94 | 1202.68 | 1484.75 |
| 19.10 | 389.78 | 898.02 | 1204.80 | 1525.18 |
| 21.05 | 395.25 | 898.53 | 1222.87 | 1525.88 |
| 24.47 | 396.67 | 900.52 | 1224.79 | 1587.76 |

---

---

|        |        |        |         |         |
|--------|--------|--------|---------|---------|
| 26.07  | 398.37 | 901.65 | 1226.96 | 1590.15 |
| 28.13  | 406.99 | 902.01 | 1235.79 | 1597.79 |
| 32.24  | 418.89 | 904.73 | 1238.21 | 1598.78 |
| 38.82  | 423.11 | 904.80 | 1250.48 | 1599.71 |
| 39.61  | 424.70 | 905.03 | 1251.21 | 1600.20 |
| 50.85  | 432.17 | 906.34 | 1253.39 | 1619.21 |
| 52.87  | 434.44 | 906.41 | 1255.78 | 1620.22 |
| 55.72  | 437.38 | 907.61 | 1256.89 | 1620.79 |
| 57.86  | 441.92 | 909.18 | 1289.01 | 1620.96 |
| 60.89  | 444.06 | 911.95 | 1311.75 | 1621.15 |
| 72.16  | 444.99 | 912.26 | 1314.53 | 1622.60 |
| 77.65  | 450.93 | 912.51 | 1330.74 | 1649.14 |
| 92.22  | 457.80 | 913.12 | 1331.11 | 1654.25 |
| 93.74  | 462.91 | 913.33 | 1331.14 | 2953.15 |
| 97.33  | 467.20 | 915.83 | 1331.27 | 2953.23 |
| 107.34 | 508.08 | 918.44 | 1331.73 | 2954.03 |
| 122.93 | 515.51 | 918.67 | 1333.47 | 2954.51 |
| 128.64 | 517.63 | 918.87 | 1333.94 | 2954.53 |
| 134.86 | 522.19 | 919.39 | 1334.15 | 2954.55 |
| 143.09 | 523.19 | 919.86 | 1335.53 | 2954.92 |
| 147.40 | 525.82 | 931.79 | 1335.81 | 2955.09 |
| 154.17 | 532.53 | 946.98 | 1358.98 | 2955.44 |

---

---

|        |        |         |         |         |
|--------|--------|---------|---------|---------|
| 161.75 | 533.03 | 948.88  | 1361.23 | 2955.79 |
| 175.26 | 538.33 | 949.36  | 1362.51 | 2959.99 |
| 178.66 | 552.29 | 956.96  | 1362.58 | 2960.03 |
| 181.43 | 563.24 | 959.79  | 1362.79 | 2960.29 |
| 190.20 | 570.57 | 960.97  | 1363.12 | 2960.86 |
| 201.43 | 582.12 | 960.98  | 1364.07 | 2961.19 |
| 205.73 | 586.51 | 972.62  | 1367.19 | 3038.24 |
| 207.13 | 596.22 | 992.62  | 1369.06 | 3038.32 |
| 220.40 | 599.94 | 997.62  | 1369.20 | 3039.22 |
| 222.66 | 609.74 | 998.97  | 1371.29 | 3039.23 |
| 223.57 | 612.45 | 999.41  | 1375.06 | 3039.41 |
| 225.52 | 615.29 | 999.69  | 1404.47 | 3040.09 |
| 228.99 | 622.85 | 1000.03 | 1404.51 | 3040.34 |
| 231.65 | 646.32 | 1001.59 | 1404.76 | 3040.36 |
| 235.11 | 653.80 | 1001.77 | 1404.80 | 3040.59 |
| 235.32 | 664.57 | 1001.79 | 1404.93 | 3040.96 |
| 240.10 | 671.11 | 1001.95 | 1410.19 | 3043.89 |
| 244.03 | 673.38 | 1002.04 | 1410.31 | 3043.94 |
| 248.78 | 676.09 | 1010.17 | 1410.34 | 3044.98 |
| 254.55 | 686.48 | 1031.18 | 1410.57 | 3045.14 |
| 256.27 | 689.92 | 1042.16 | 1410.67 | 3045.23 |
| 266.77 | 690.99 | 1048.68 | 1411.80 | 3045.66 |

---

---

|        |        |         |         |         |
|--------|--------|---------|---------|---------|
| 269.52 | 696.71 | 1057.31 | 1412.28 | 3046.73 |
| 269.82 | 699.63 | 1065.56 | 1412.54 | 3047.02 |
| 270.68 | 710.82 | 1069.72 | 1412.61 | 3048.20 |
| 272.25 | 712.68 | 1071.35 | 1412.85 | 3048.26 |
| 274.07 | 733.45 | 1085.99 | 1427.38 | 3049.96 |
| 280.60 | 737.27 | 1090.64 | 1428.55 | 3049.98 |
| 283.22 | 745.19 | 1092.47 | 1428.72 | 3050.67 |
| 288.53 | 748.12 | 1099.59 | 1428.90 | 3050.89 |
| 301.52 | 754.14 | 1100.72 | 1429.10 | 3051.12 |
| 309.82 | 755.35 | 1114.92 | 1429.74 | 3051.33 |
| 313.13 | 756.98 | 1116.45 | 1430.62 | 3051.86 |
| 318.48 | 769.40 | 1133.27 | 1431.50 | 3052.02 |
| 320.53 | 777.79 | 1137.60 | 1431.72 | 3052.42 |
| 321.50 | 780.89 | 1143.40 | 1431.81 | 3054.07 |
| 322.08 | 788.42 | 1158.35 | 1432.10 | 3099.38 |
| 322.30 | 791.24 | 1170.76 | 1432.24 | 3099.42 |
| 322.99 | 799.36 | 1172.90 | 1432.30 | 3102.54 |
| 324.21 | 803.27 | 1174.86 | 1436.23 | 3103.54 |
| 328.09 | 805.43 | 1176.78 | 1440.89 | 3117.46 |
| 333.42 | 808.42 | 1178.68 | 1441.24 | 3122.04 |
| 339.96 | 819.49 | 1182.09 | 1441.70 | 3126.29 |
| 342.17 | 823.23 | 1182.71 | 1445.01 | 3126.33 |

---

---

|        |        |         |         |         |
|--------|--------|---------|---------|---------|
| 344.69 | 825.35 | 1182.91 | 1445.45 | 3128.25 |
| 346.00 | 832.48 | 1183.79 | 1445.84 | 3128.35 |
| 349.36 | 833.43 | 1184.07 | 1453.31 | 3137.06 |
| 358.08 | 834.07 | 1185.15 | 1453.58 | 3141.95 |
| 366.01 | 834.41 | 1185.32 | 1463.44 | 3142.01 |
| 369.14 | 840.86 | 1185.42 | 1464.32 | 3143.98 |
| 375.55 | 844.20 | 1185.63 | 1466.66 | 3144.08 |

---

The geometry of the iron coordination sphere computed for  $\text{hPc}^t\text{Bu}_4\text{Fe}$  is close to those obtained for unsubstituted  $\text{hFePc}$  complex by X-ray structural determination [S1]. Thus, the lengths of the Fe-N bonds in the distorted phthalocyanine ring according to X-ray data are 1.906, 1.903, 1.873 and 1.870 Å while computed values are 1.879, 1.879, 1.861 and 1.861 Å, respectively. The length of the bond between iron and fifth nitrogen of the isoindole fragment is 1.866 Å from X-ray data in non-substituted complex and 1.803 Å from the computation for the helmet phthalocyanine bearing *tert*-butyl substituents. Such a big difference might occur, most probably, because of the presence of methanol ligand in  $\text{hPcFe}$  crystal and the absence of the sixth ligand in the model structure of  $\text{hPc}^t\text{Bu}_4\text{Fe}$ .

## References

- S1. H. M. Kieler, M. J. Bierman, I. A. Guzei, P. J. Liska and R. W. McGaff, *Chem. Commun.* 2006, 3326-3328.
- S2. ORCA, Version 2.9.0, January 2012, An ab initio, DFT and semiempirical SCF-MO package – written by F. Neese, with contributions from U. Becker, D. Bykov, D.

Ganyushin, A. Hansen, R. Izsak, D.G. Liakos, C. Kollmar, S. Kossmann, D.A. Pantazis, T. Petrenko, C. Reimann, C. Riplinger, M. Roemelt, B. Sandhöfer, I. Schapiro, K. Sivalingam, F. Wennmohs, B. Wezislá and contributions from our collaborators: M. Kállay, S. Grimme, E. Valeev. <http://www.thch.uni-bonn.de/tc/orca/>

S3. A. Schaefer, H. Horn and R. Ahlrichs, *J. Chem. Phys.* 1992, 97, 2571.

S4. M. Filatov, *Chem. Phys. Lett.* 2002, 365, 222.
